# Supplementary material for: Modulation of Streptococcus mutans Adherence to Hydroxyapatite by Engineered Salivary Peptides
Source: MDPI journal article supplement (doi:10.3390/microorganisms10020223), 2022-01-20
Supplement: s1 [file s1]

**Supplementary Table S1.** List of cell wall proteins identified in the planktonic bacteria according to the treatments and at each time point evaluated.

| Gene Name \ Time (h) | Treatment |   |   |            |   |   |     |   |   |         |   |   |          |   |   |      |   |   |                |   |   |   |   |   |
|----------------------|-----------|---|---|------------|---|---|-----|---|---|---------|---|---|----------|---|---|------|---|---|----------------|---|---|---|---|---|
|                      | Statherin |   |   | Histatin 3 |   |   | DR9 |   |   | DR9-DR9 |   |   | DR9-RR14 |   |   | RR14 |   |   | Parotid Saliva |   |   |   |   |   |
|                      | 2         | 4 | 8 | 2          | 4 | 8 | 2   | 4 | 8 | 2       | 4 | 8 | 2        | 4 | 8 | 2    | 4 | 8 | 2              | 4 | 8 | 2 | 4 | 8 |
| <i>ackA</i>          |           |   | x |            |   | x |     |   |   |         |   |   |          |   | x |      |   | x |                |   |   |   |   | x |
| <i>acp</i>           |           |   | x |            |   | x |     |   | x |         |   | x |          |   | x |      |   | x |                |   |   |   |   | x |
| <i>aldR</i>          |           |   | x |            |   |   |     |   |   |         |   |   |          |   |   |      |   |   |                |   |   |   |   |   |
| <i>aroA</i>          |           |   | x |            |   |   |     |   |   |         |   |   |          |   |   |      |   | x |                |   |   |   |   | x |
| <i>aroH</i>          |           |   |   |            |   | x |     |   |   |         |   |   |          |   |   |      |   |   |                |   |   |   |   |   |
| <i>aspB</i>          |           |   | x |            |   | x |     |   | x |         |   | x |          |   | x |      |   | x |                |   |   |   |   | x |
| <i>bacA1</i>         |           |   |   |            |   | x |     |   |   |         |   |   |          |   |   |      |   |   |                |   |   |   |   |   |
| <i>clp</i>           | x         | x |   |            |   | x |     |   | x |         |   | x |          |   |   |      |   |   |                |   |   | x | x |   |
| <i>clpC</i>          |           |   |   |            |   |   |     |   |   |         |   | x |          |   |   |      |   |   |                |   |   |   |   |   |
| <i>cnhA</i>          |           |   | x |            |   |   |     |   |   |         |   |   |          |   |   |      |   |   |                |   |   |   |   |   |
| <i>dapH</i>          |           |   | x |            |   | x |     |   |   |         |   |   |          |   | x |      |   | x |                |   |   |   |   | x |
| <i>dltC</i>          |           |   | x |            |   |   |     |   |   |         |   |   |          |   |   |      |   |   |                |   |   |   |   |   |
| <i>dnaK</i>          | x         | x | x | x          | x | x | x   | x | x | x       | x | x | x        | x | x | x    |   | x | x              | x | x | x | x | x |
| <i>eno</i>           | x         | x | x | x          | x | x | x   | x | x | x       | x | x | x        | x | x | x    |   | x |                | x | x | x | x | x |
| <i>fabF</i>          |           |   | x |            |   | x |     |   |   |         |   |   |          |   | x |      |   | x |                |   |   |   |   | x |
| <i>fbaA</i>          |           |   | x |            |   | x |     |   |   |         |   |   |          |   | x |      |   | x |                |   |   |   |   |   |
| <i>flaW</i>          |           |   | x |            |   |   |     |   | x |         |   |   |          |   | x |      |   | x |                |   |   |   |   |   |
| <i>frf</i>           |           |   |   |            |   | x |     |   | x |         |   | x |          |   |   |      |   | x |                |   |   |   |   | x |
| <i>fusA</i>          |           |   | x | x          |   | x | x   |   | x | x       | x |   |          | x | x |      |   | x |                |   |   |   |   | x |
| <i>gapC</i>          | x         | x | x | x          | x | x | x   | x | x | x       | x | x | x        | x | x | x    |   | x |                |   | x | x | x | x |
| <i>gapN</i>          |           |   | x |            |   | x |     |   |   |         |   |   |          |   |   |      |   | x |                |   |   |   |   | x |

|             |       |       |       |       |       |     |       |
|-------------|-------|-------|-------|-------|-------|-----|-------|
| <i>gatA</i> |       |       |       |       |       | X   |       |
| <i>gbpB</i> | X     |       |       |       |       |     |       |
| <i>gbpC</i> | X     | X     | X     |       | X     |     | X     |
| <i>glgP</i> |       |       | X     |       |       | X   |       |
| <i>glk</i>  | X     | X     |       | X     | X     | X   | X     |
| <i>glnA</i> | X     | X     | X     |       | X     | X   | X     |
| <i>glyA</i> | X     | X     |       |       |       |     |       |
| <i>gpmA</i> | X X X | X X   | X X   | X X   | X     | X   | X X X |
| <i>greA</i> |       |       |       |       | X     |     | X     |
| <i>groL</i> | X X X | X X X | X X X | X X X | X X X | X X | X X X |
| <i>groS</i> | X     |       | X     | X     | X     |     | X     |
| <i>hsdM</i> |       | X X   | X     | X     | X     |     | X     |
| <i>hup</i>  | X X X | X X   | X     | X     | X X   | X X | X X X |
| <i>ilvC</i> | X X X | X X   | X X   | X X X | X X X | X   | X X X |
| <i>ilvE</i> | X     | X     |       |       | X     | X   | X     |
| <i>livK</i> | X     | X     |       | X     | X     | X   | X     |
| <i>mleS</i> | X     | X     | X     |       |       |     | X     |
| <i>mtlR</i> | X     |       |       |       | X     | X   |       |
| <i>nagB</i> |       |       |       |       | X     |     |       |
| <i>naoX</i> | X     | X     | X     |       | X     |     |       |
| <i>oppA</i> | X     | X     |       | X     | X     | X   | X X   |
| <i>pepN</i> |       |       |       |       |       |     | X     |
| <i>pepO</i> |       |       | X     |       |       | X   | X     |
| <i>pfkA</i> | X     |       |       |       |       | X   | X     |
| <i>pgi</i>  | X X   | X     |       | X     | X     | X   | X     |
| <i>pgk</i>  | X X X | X X X | X X X | X X X | X X X | X X | X X X |
| <i>pgm</i>  | X     | X     | X     |       | X     |     |       |
| <i>proS</i> |       |       |       |       |       | X   |       |

|             |   |   |   |   |   |   |   |   |
|-------------|---|---|---|---|---|---|---|---|
| <i>psaB</i> |   |   |   |   |   | X |   | X |
| <i>ptsG</i> |   |   |   |   |   |   | X |   |
| <i>ptsH</i> |   | X |   |   |   |   |   |   |
| <i>ptsI</i> | X | X | X | X | X | X | X | X |
| <i>purC</i> |   | X |   |   |   |   |   |   |
| <i>rmlB</i> |   | X |   |   | X |   | X | X |
| <i>rpiA</i> |   | X |   |   |   |   | X |   |
| <i>rplA</i> |   |   |   |   | X |   | X | X |
| <i>rplB</i> |   |   |   |   |   |   |   | X |
| <i>rplD</i> |   |   |   |   |   |   |   | X |
| <i>rplE</i> | X | X | X | X | X | X | X | X |
| <i>rplF</i> |   |   | X |   |   |   |   | X |
| <i>rplJ</i> | X | X | X | X | X | X | X | X |
| <i>rplK</i> |   | X | X |   | X | X |   |   |
| <i>rplL</i> | X | X | X | X | X | X | X | X |
| <i>rplO</i> |   |   | X |   | X | X |   | X |
| <i>rplV</i> |   |   |   |   |   | X |   | X |
| <i>rplX</i> |   |   |   |   |   |   |   | X |
| <i>rpoC</i> |   | X | X |   | X | X | X | X |
| <i>rpsB</i> |   |   | X | X |   | X |   | X |
| <i>rpsC</i> |   | X | X | X |   |   | X | X |
| <i>rpsD</i> |   |   | X |   | X |   | X |   |
| <i>rpsE</i> | X | X | X | X | X | X | X | X |
| <i>rpsG</i> | X |   |   |   |   |   |   | X |
| <i>rpsH</i> |   |   |   |   |   |   |   | X |
| <i>rpsJ</i> | X | X | X | X | X | X | X | X |
| <i>rpsL</i> |   |   |   |   | X |   |   |   |
| <i>rpsM</i> | X |   |   |   |   |   |   |   |
